# Supplementary material for: Identification of Eusynstyelamide B as a Potent Cell Cycle Inhibitor Following the Generation and Screening of an Ascidian-Derived Extract Library Using a Real Time Cell Analyzer
Source: PubMed Central journal article supplement (PMC4210896; doi:10.3390/md12105222), 2014-10-17
Supplement: marinedrugs-12-05222-s001.pdf [file marinedrugs-12-05222-s001.pdf]

# Supplementary Information

## Table of Contents

- Table S1** Cell cycle distribution of MDA-MB-231 cells treated with the active ascidian extracts was determined by flow cytometry through DNA quantification of cells stained with propidium iodide
- Figure S1** Morphology analysis of MDA-MB-231 cells treated with the indicated ascidian extracts (1  $\mu$ ge/ $\mu$ L) after 24 h seeding
- S1** Experimental data for the *bis*-TFA salt of eusynstyelamide B (**1**)
- Figure S2** HPLC UV chromatogram of the active *Didemnum candidum* extract (ascidian code: 114) selected for bioassay-guided fractionation
- Figure S3**  $^1\text{H}$  NMR spectrum of the *bis*-TFA salt of eusynstyelamide B (**1**) in  $\text{DMSO-}d_6$
- Figure S4**  $^{13}\text{C}$  NMR spectrum of the *bis*-TFA salt of eusynstyelamide B (**1**) in  $\text{DMSO-}d_6$
- Figure S5** COSY spectrum of the *bis*-TFA salt of eusynstyelamide (**1**) in  $\text{DMSO-}d_6$
- Figure S6** HSQC spectrum of the *bis*-TFA salt of eusynstyelamide (**1**) in  $\text{DMSO-}d_6$
- Figure S7** HMBC spectrum of the *bis*-TFA salt of eusynstyelamide (**1**) in  $\text{DMSO-}d_6$
- Figure S8** Dose response curves for the *bis*-TFA salt of eusynstyelamide B (**1**, EB) in the breast cancer cell line MDA-MB-231 at 72 h post-treatment

**Table S1.** Cell cycle distribution of MDA-MB-231 cells treated with the active ascidian extracts was determined by flow cytometry through DNA quantification of cells stained with propidium iodide. The results are presented as mean  $\pm$  SD of triplicates. Significant samples compared to the control are marked with an asterisk \* ( $p < 0.05$ ).

| Extract    | Sub-G1 |     | G0/G1  |      | S      |      | G2/M   |     |
|------------|--------|-----|--------|------|--------|------|--------|-----|
|            | Mean   | SD  | Mean   | SD   | Mean   | SD   | Mean   | SD  |
| DMSO       | 6.4    | 1.7 | 43.1   | 3.2  | 52.0   | 0.9  | 5.0    | 2.3 |
| <b>15</b>  | 15.2 * | 2.2 | 18.3 * | 1.6  | 67.6 * | 2.3  | 14.1   | 3.0 |
| <b>17</b>  | 8.4    | 0.6 | 1.4 *  | 0.2  | 62.4   | 0.6  | 36.2 * | 0.3 |
| <b>29</b>  | 5.8    | 1.5 | 18.7 * | 15.7 | 69.4 * | 11.9 | 11.9   | 9.5 |
| <b>38</b>  | 11.1   | 3.4 | 19.3 * | 2.6  | 72.2 * | 4.1  | 8.5    | 2.3 |
| 43         | 5.0    | 1.7 | 30.3   | 4.1  | 60.5   | 1.2  | 9.2    | 3.0 |
| 44         | 4.4    | 2.5 | 33.5   | 15.6 | 55.7   | 6.3  | 10.8   | 9.3 |
| 53         | 4.5    | 0.6 | 41.1   | 2.4  | 52.7   | 3.6  | 6.2    | 1.5 |
| <b>61</b>  | 8.0    | 1.6 | 22.4 * | 10.4 | 71.4 * | 6.0  | 6.2    | 4.4 |
| <b>63</b>  | 17.2 * | 6.6 | 1.3 *  | 0.8  | 84.4 * | 9.5  | 14.4   | 2.0 |
| <b>71</b>  | 3.4    | 1.0 | 27.7 * | 1.7  | 66.4 * | 0.5  | 5.9    | 1.3 |
| <b>75</b>  | 6.4    | 4.9 | 4.3 *  | 2.4  | 95.7 * | 2.4  | 0.0    | 0.0 |
| <b>81</b>  | 14.2 * | 4.7 | 3.8 *  | 1.0  | 75.1 * | 2.0  | 21.1 * | 1.0 |
| <b>83</b>  | 6.8    | 1.6 | 16.7 * | 6.3  | 58.5   | 2.9  | 24.9 * | 9.2 |
| 85         | 6.5    | 1.9 | 39.0   | 0.6  | 56.0   | 2.7  | 5.7    | 1.4 |
| 92         | 5.3    | 1.5 | 31.7   | 2.8  | 63.3   | 4.4  | 5.0    | 4.7 |
| <b>102</b> | 2.1    | 5.4 | 28.9 * | 0.5  | 64.9   | 1.1  | 6.3    | 0.6 |
| 106        | 8.6    | 1.2 | 51.4   | 0.8  | 44.3   | 1.0  | 4.3    | 1.1 |
| <b>114</b> | 16.4 * | 2.7 | 5.5 *  | 0.1  | 69.6 * | 1.1  | 25.0 * | 0.8 |
| 117        | 9.7    | 3.5 | 54.0   | 1.6  | 39.8   | 2.7  | 6.1    | 1.4 |
| 128        | 5.2    | 1.7 | 31.6   | 3.4  | 58.6   | 1.2  | 9.8    | 2.3 |
| 133        | 7.2    | 4.2 | 43.9   | 7.4  | 49.8   | 5.4  | 6.3    | 2.1 |

**Figure S1.** Morphology analysis of MDA-MB-231 cells treated with the indicated ascidian extracts (200  $\mu$ ge) after 24 h seeding. As controls, cells were treated with complete medium, DMSO (0.1%), or doxorubicin (Dox, 10  $\mu$ M). The morphology of the cells after treatment was categorized in five groups (A–F). (A) Cells not fully attached; (B) Cells with typical signs of early stages of cell death; (C) Cells well attached to substrate and in contact with other cells; (D) Flat and enlarged cells; (E) High number of cells detached from substrate. The images were obtained with an Olympus IX70 microscope using a 10 $\times$  objective. Scale bar = 100  $\mu$ m.

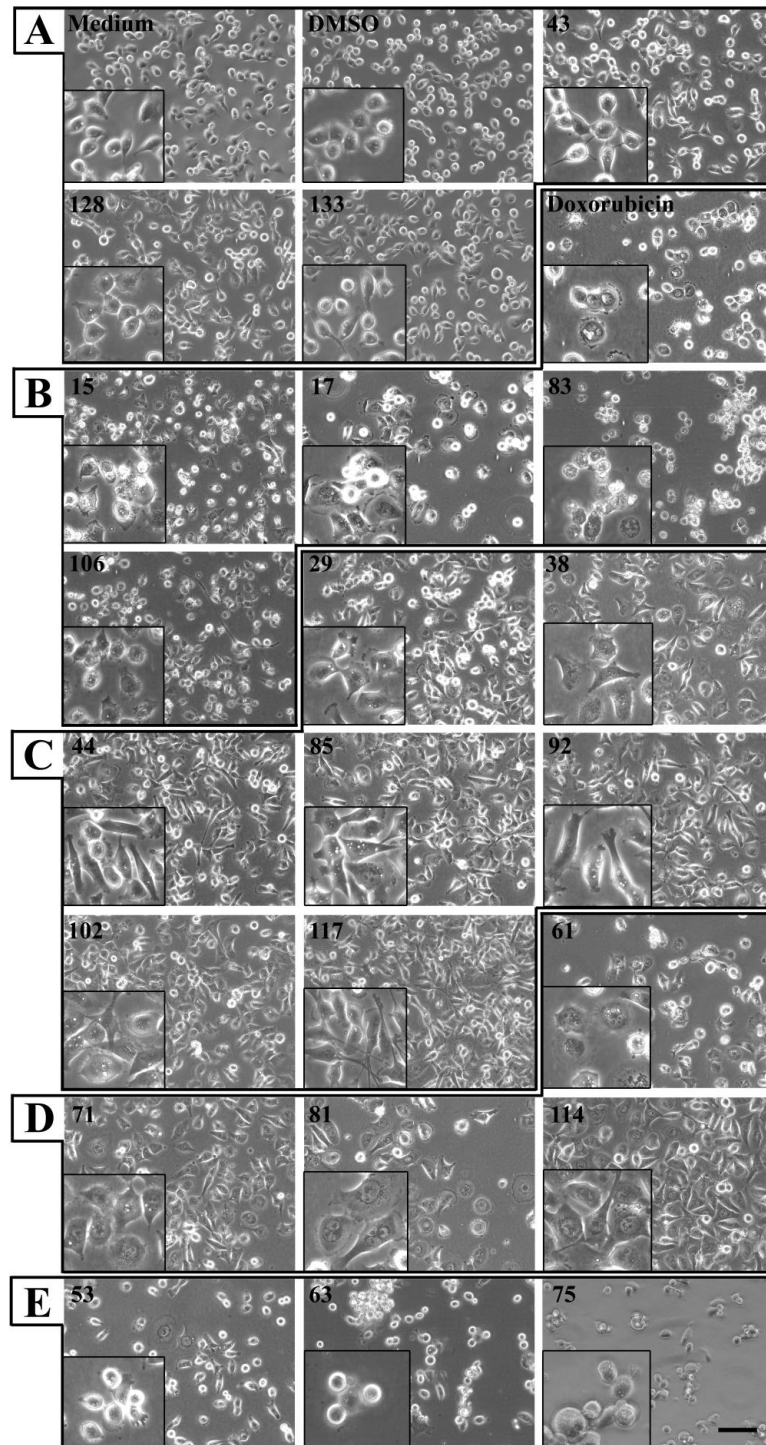

### S1. Experimental Data for the *bis*-TFA Salt of Eusynstyelamide B (1)

*Bis*-TFA salt of eusynstyelamide B (1). Isolated as a stable brown gum (3.5 mg);  $[\alpha]_D^{26} = \pm 0$  (*c* 0.133, MeOH); literature value  $[\alpha]_D^{19} = \pm 0$  (*c* 0.100, MeOH) [1, 2]; CD (MeOH)  $\lambda_{\max} (\Delta\epsilon)$  208 (−3.0), 227 (−4.6), 298 (−1.1) nm; literature value CD (MeOH)  $\lambda_{\max} (\Delta\epsilon)$  224 (−11) nm [1,2];  $^1\text{H NMR}^a$  (600 MHz, DMSO-*d*<sub>6</sub>)  $\delta_{\text{H}}$  10.93 (1H, d, *J* = 2.3, 1-NH), 6.86 (1H, d, *J* = 2.3, H-2), 7.01 (1H, d, *J* = 8.5 Hz, H-4), 6.77 (1H, dd, *J* = 8.5, 1.7 Hz, H-5), 7.45 (1H, d, *J* = 1.7 Hz, H-7), 3.26 (1H, d, *J* = 14.5 Hz, H-8a), 2.78 (1H, d, *J* = 14.5 Hz, H-8b), 6.18 (1H, s, 9-OH), 3.21 (1H, m, H-12a), 2.91 (1H, m, H-12b), 1.48 (2H, m, H-13), 1.40 (2H, tt, *J* = 6.5, 6.5 Hz, H-14), 3.04 (2H, dt, *J* = 5.5, 6.5 Hz, H-15), 7.49 (1H, t, *J* = 5.5 Hz, H-16), 11.15 (1H, d, *J* = 2.4 Hz, 18-NH), 7.65 (1H, d, *J* = 2.4 Hz, H-19), 6.81 (1H, d, *J* = 8.5 Hz, H-21), 6.92 (1H, dd, *J* = 8.5, 1.7 Hz, H-22), 7.51 (1H, d, *J* = 1.7 Hz, H-24), 4.02 (1H, s, H-25), 5.42 (1H, s, 26-OH), 7.72 (1H, t, *J* = 6.0 Hz, H-28), 2.88 (1H, m, H-29a), 2.76 (1H, m, H-29b), 1.12 (2H, m, H-30), 1.12 (2H, m, H-31), 2.87 (2H, m, H-32), 7.37 (1H, t, *J* = 5.8 Hz, H-33);  $^{13}\text{C NMR}$  (125 MHz, DMSO-*d*<sub>6</sub>)  $\delta_{\text{C}}$  125.6 (C-2), 109.1 (C-3), 126.7 (C-3a), 120.5 (C-4), 120.5 (C-5), 113.6<sup>c</sup> (C-6), 113.3 (C-7), 136.6 (C-7a), 29.0 (C-8), 78.2 (C-9), 175.3 (C-10), 40.2 (C-12), 25.9<sup>d</sup> (C-13), 25.5 (C-14), 40.3 (C-15), 156.7<sup>b</sup> (C-17), 126.7 (C-19), 105.9 (C-20), 127.5 (C-20a), 120.3 (C-21), 120.8 (C-22), 113.5<sup>c</sup> (C-23), 113.5 (C-24), 135.9 (C-24a), 44.0 (C-25), 90.3 (C-26), 168.9 (C-27), 38.4 (C-29), 25.1<sup>d</sup> (C-30), 25.6 (C-31), 40.0 (C-32), 156.6<sup>b</sup> (C-34); (+)-LRESIMS (rel. int.) *m/z* 787 (30%)  $[\text{M} - 2\text{CF}_3\text{COO}^- + \text{H}]^+$ , 789 (100%)  $[\text{M} - 2\text{CF}_3\text{COO}^- + \text{H}]^+$ , 791 (30%)  $[\text{M} - 2\text{CF}_3\text{COO}^- + \text{H}]^+$ . <sup>a</sup> Signals for the exchangeable signals 17-NH<sub>3</sub><sup>+</sup>, 17-NH, 34-NH<sub>3</sub><sup>+</sup>, and 34-NH were not assigned; <sup>b-d</sup> Signals are interchangeable.

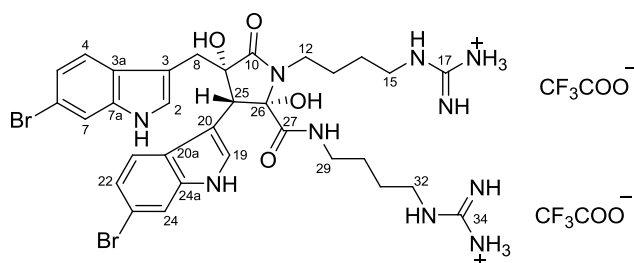

**Figure S2.** HPLC UV chromatogram of the active *Didemnum candidum* (Extract 114) selected for bioassay-guided fractionation. Every minute of the chromatogram represents one fraction. The yellow shading highlights the active region identified through bioassay-guided fractionation, which corresponds to **1**.

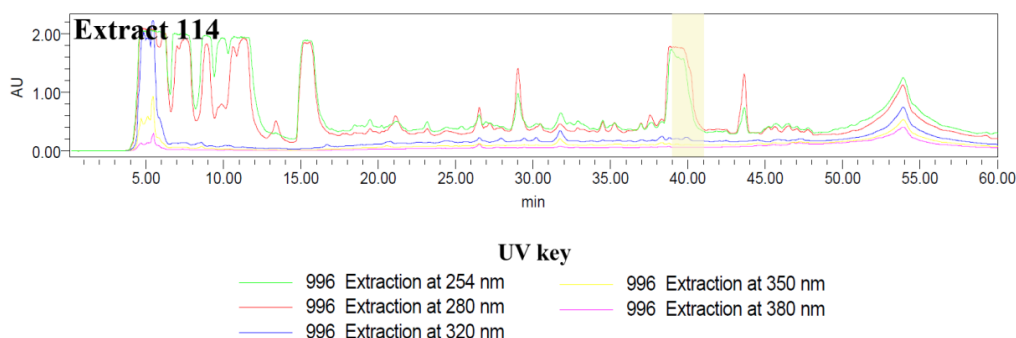

**Figure S3.**  $^1\text{H}$  NMR spectrum of the *bis*-TFA salt of eusynstyelamide B (**1**) in  $\text{DMSO-}d_6$ .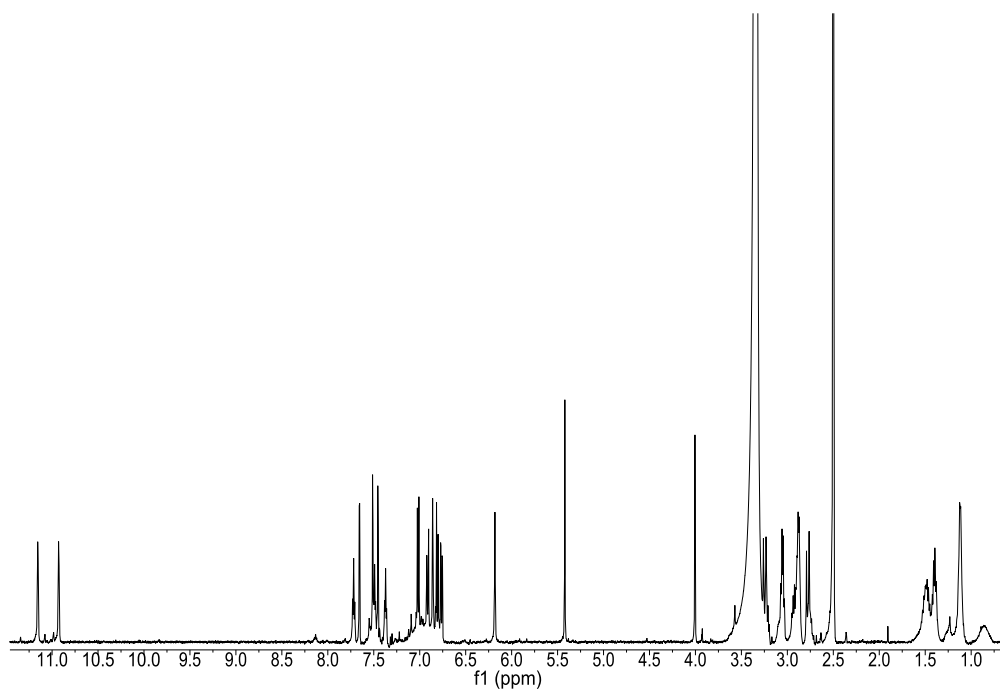**Figure S4.**  $^{13}\text{C}$  NMR spectrum of the *bis*-TFA salt of eusynstyelamide B (**1**) in  $\text{DMSO-}d_6$ .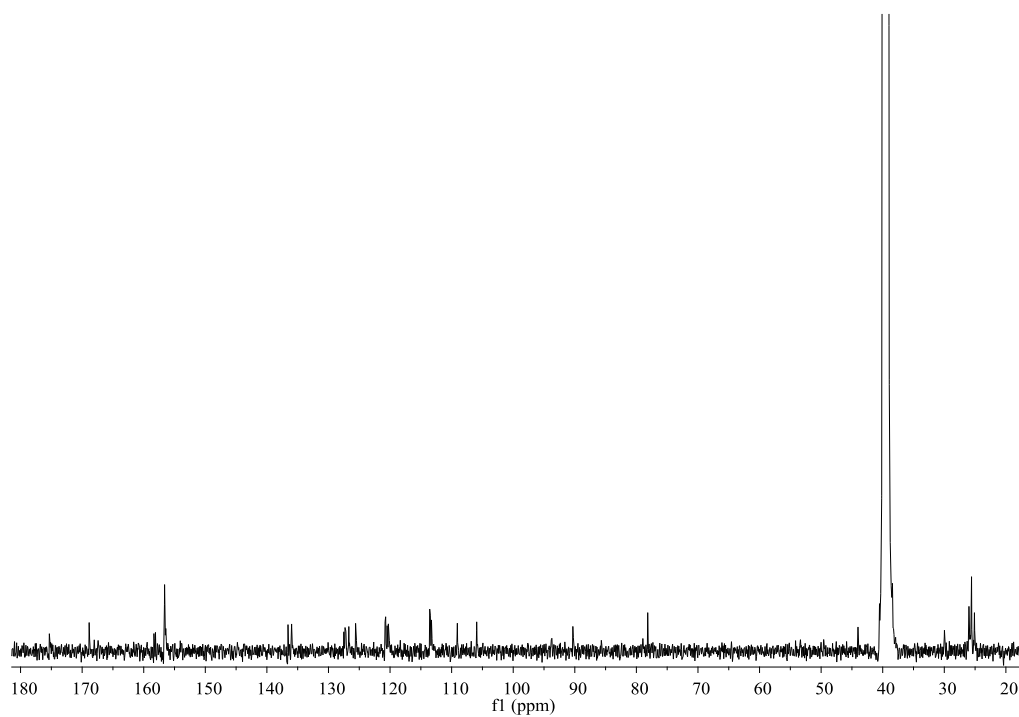

**Figure S5.** COSY spectrum of the *bis*-TFA salt of eusynstyelamide B (1) in DMSO-*d*<sub>6</sub>.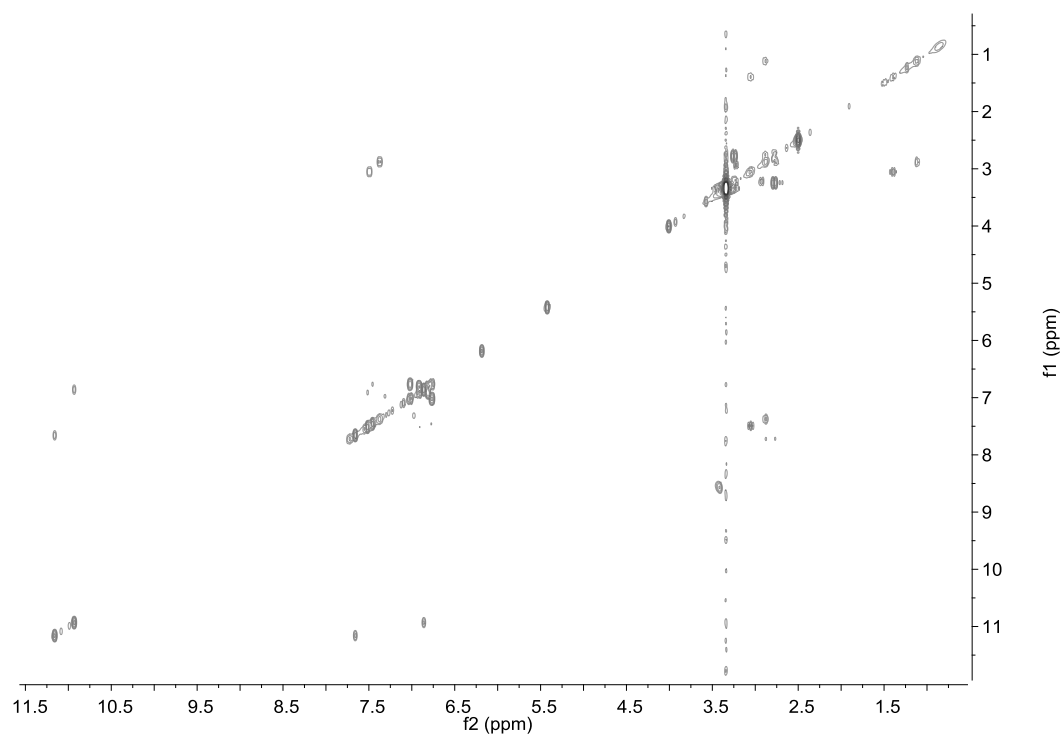**Figure S6.** HSQC spectrum of the *bis*-TFA salt of eusynstyelamide B (1) in DMSO-*d*<sub>6</sub>.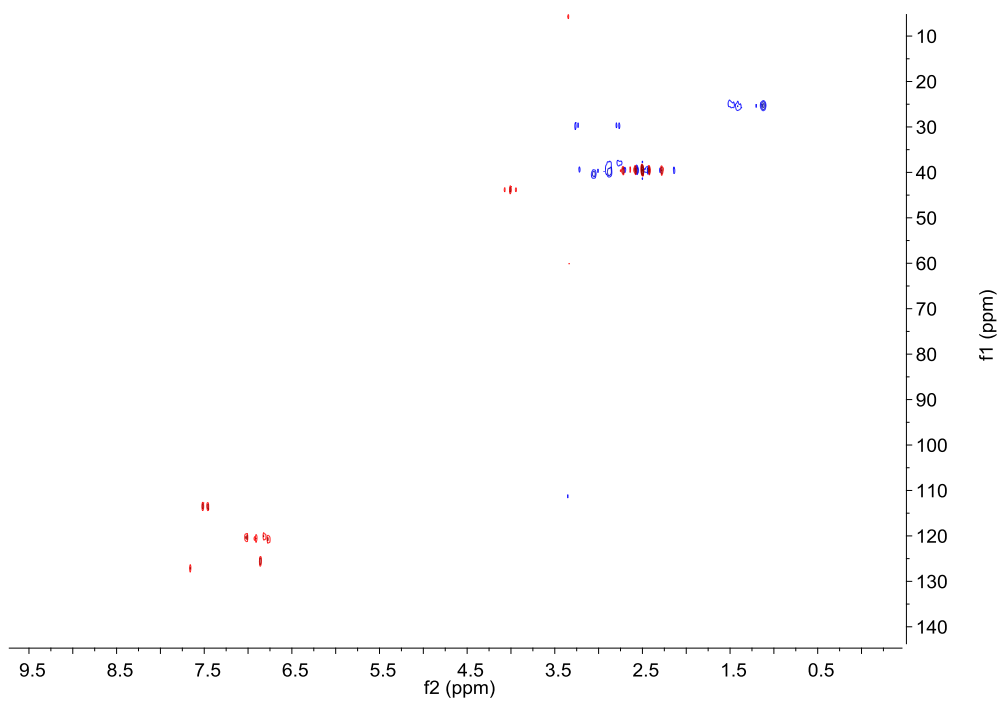

**Figure S7.** HMBC spectrum of the *bis*-TFA salt of eusynstyelamide B (**1**) in DMSO-*d*<sub>6</sub>.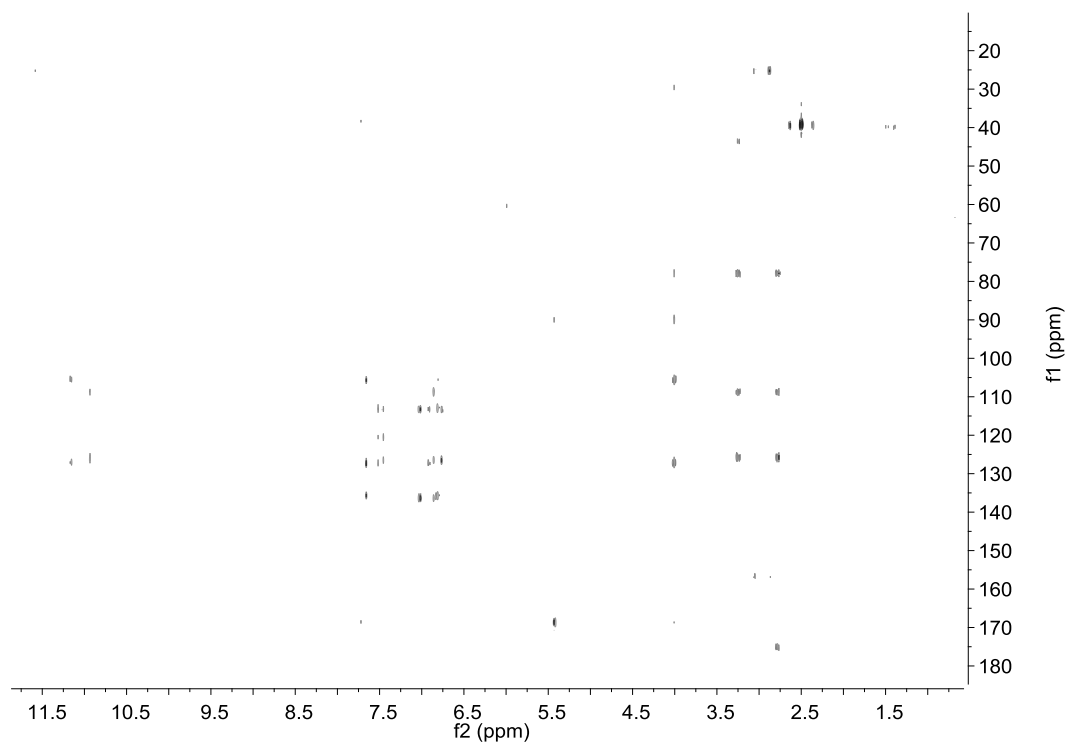**Figure S8.** Dose response curves for eusynstyelamide B (**1**, EB) in the breast cancer cell line MDA-MB-231 at 72 h post treatment. The data used to calculate the IC<sub>50</sub> of **1** in MDA-MB-231 were acquired in an AlamarBlue® assay.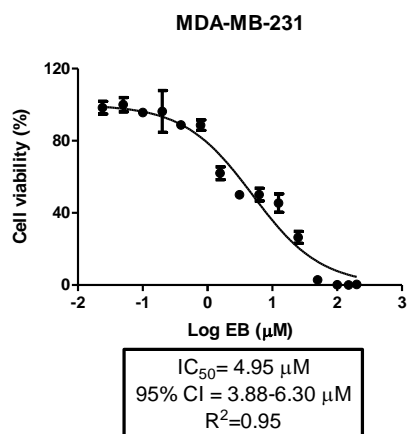

## References

1. Tapiolas, D.M.; Bowden, B.F.; Abou-Mansour, E.; Willis, R.H.; Doyle, J.R.; Muirhead, A.N.; Liptrot, C.; Llewellyn, L.E.; Wolff, C.W.W.; Wright, A.D.; *et al.* Eusynstyelamides A, B, and C, nNOS Inhibitors, from the Ascidian *Eusynstyela latericius*. *J. Nat. Prod.* **2009**, *72*, 1115–1120.
2. Tadesse, M.; Tabudravu, J.N.; Jaspars, M.; Strom, M.B.; Hansen, E.; Andersen, J.H.; Kristiansen, P.E.; Haug, T. The antibacterial ent-eusynstyelamide B and eusynstyelamides D, E, and F from the Arctic bryozoan *Tegella cf. spitzbergensis*. *J. Nat. Prod.* **2011**, *74*, 837–841.

© 2014 by the authors; licensee MDPI, Basel, Switzerland. This article is an open access article distributed under the terms and conditions of the Creative Commons Attribution license (<http://creativecommons.org/licenses/by/4.0/>).
